# Supplementary material for: Neurogenesis during Brittle Star Arm Regeneration Is Characterised by a Conserved Set of Key Developmental Genes
Source: MDPI journal article supplement (doi:10.3390/biology11091360), 2022-09-16
Supplement: s1 [file s1]

## Supplementary material

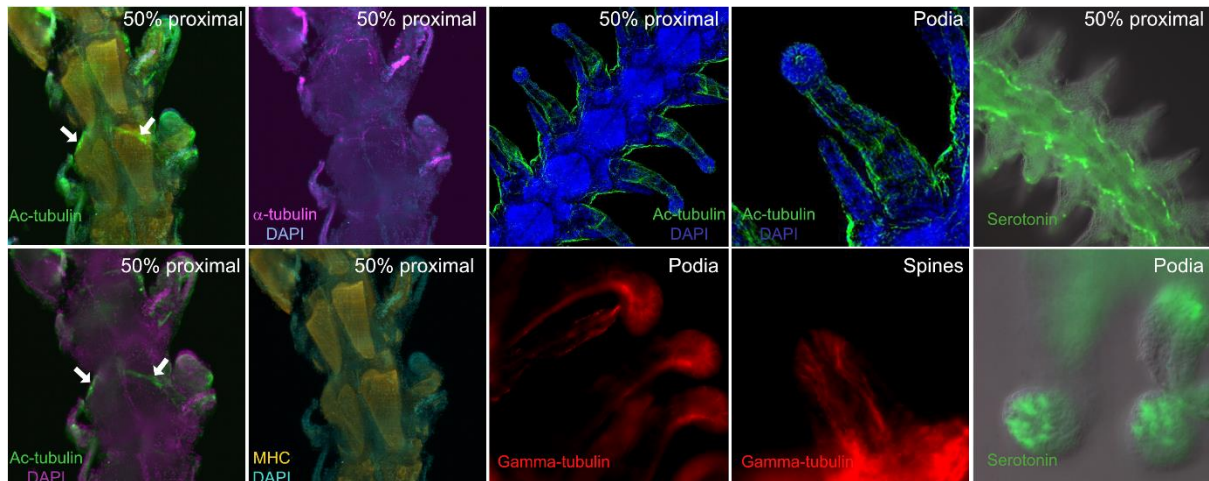

Figure S1: Nervous system antibody stainings in regenerating arms of *A. filiformis*. In the 50% fully differentiated proximal segments of a regenerating arm there is localized expression of MHC in intersegmental muscles, while alpha-tubulin and acetylated-tubulin antibodies stain the sensory neurons and relative neuronal projections from the podia and spine neurons. Arrows indicate proximal muscle nerves. Gamma-tubulin is restricted to peripheral nerve tracts lining the podia and spines. Serotonin-positive neuronal bodies can be seen forming clusters of cells running along the aboral side of the arm. A few single positive cells can be seen at the tips of the spines and clusters of positive serotonergic neurons are found at the tip of the podia.

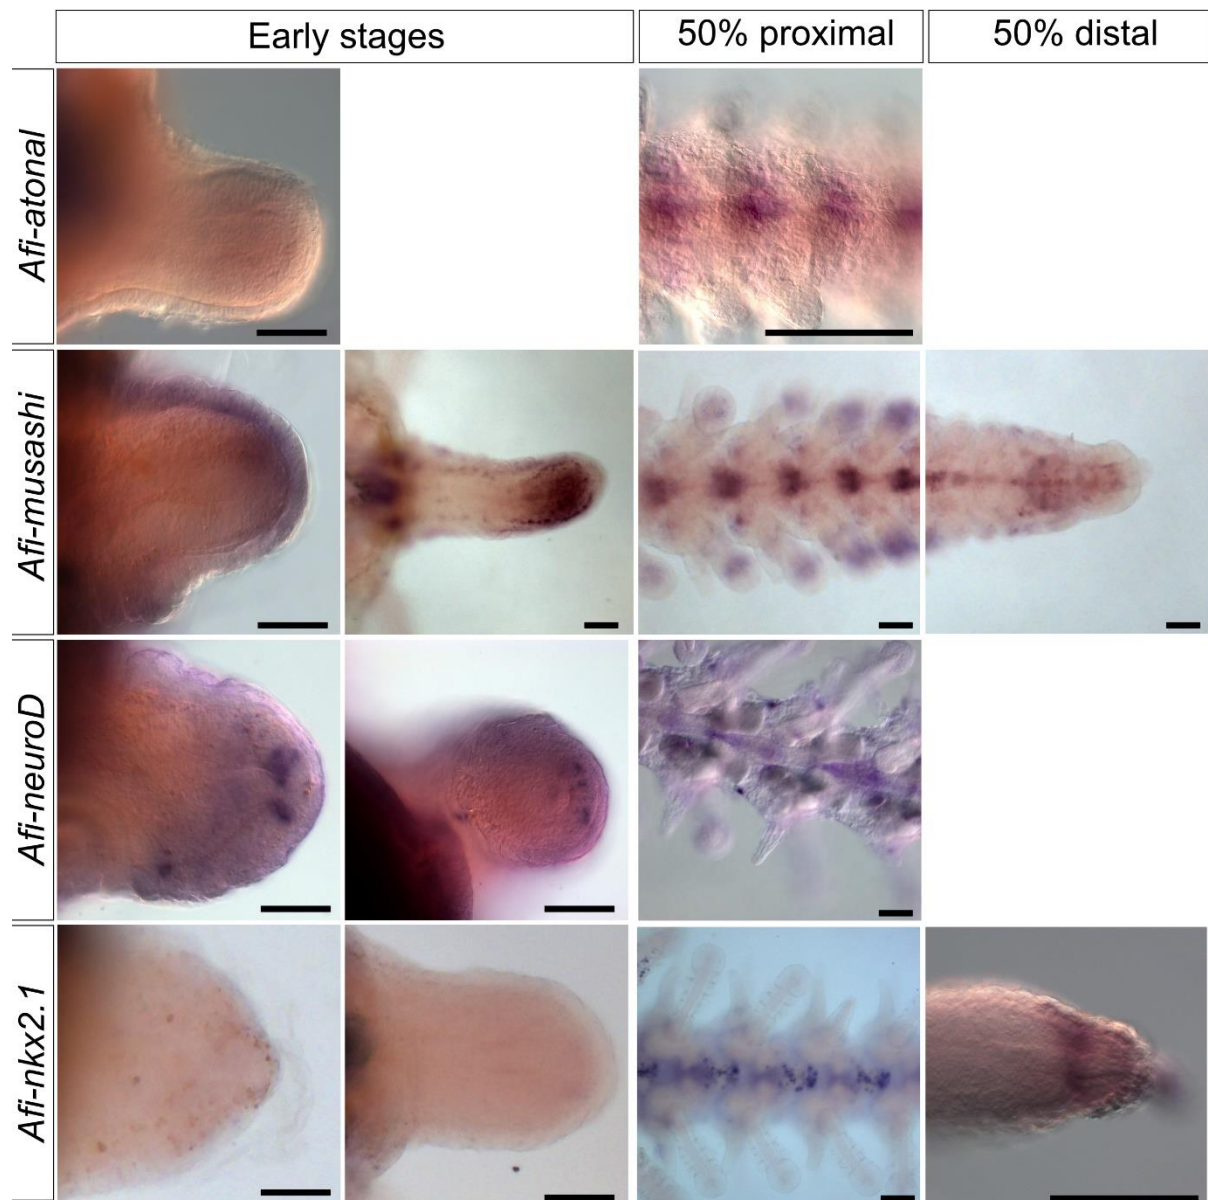

Fig S2: Whole mount in situ hybridization of *Afi-atonal*, *Afi-musashi*, *Afi-neuroD*, *Afi-nkx2.1* in *A. filiformis* at early (stage 2/3 and stage 4/5) and late (50% proximal and distal segments) stages of arm regeneration showing a variety of patterns within the different regions of the regenerating nervous system. OV – oral view, OLV – oral-lateral view, LV – lateral view. Scale bar – 100  $\mu$ m.

| Primary antibody                  | Cat #                        | Dilution | Antibody type | Epitope/Gene       | Reference                  |
|-----------------------------------|------------------------------|----------|---------------|--------------------|----------------------------|
| MHC                               | -                            | 1:500    | RP            | Sp-MHC             | Annunziata and Arnone 2014 |
| SynB/1E11                         | -                            | 1:500    | MM            | Sp-SynaptotagminB  | Yoko Nakajima et al. 2004  |
| alpha-Tubulin                     | Santa Cruz BioTech, sc-23948 | 1:500    | MM            | $\alpha$ -tubulin  |                            |
| Ac-Tubulin                        | Sigma, T7451                 | 1:500    | MM            | acetylated tubulin |                            |
| Gamma-Tubulin                     | Sigma, GTU 88                | 1:500    | MM            | $\gamma$ -tubulin  |                            |
| Secondary antibody                | Cat #                        | Dilution | Antibody type | Epitope/Gene       | Reference                  |
| Goat anti-Rabbit, Alexa Fluor 555 | A-21428                      | 1:1000   |               |                    |                            |
| Goat anti-Mouse, Alexa Fluor 488  | A-11001                      | 1:1000   |               |                    |                            |
| Goat anti-Rabbit, Alexa Fluor 633 | A-21070                      | 1:1000   |               |                    |                            |
| Goat anti-Mouse, Alexa Fluor 555  | A-21422                      | 1:1000   |               |                    |                            |

Table S1: Primary and secondary antibodies used in this study and relative sources, MM – mouse monoclonal; RP – rabbit polyclonal

| Gene               | Transcriptome ID         | Probe length (bp) |
|--------------------|--------------------------|-------------------|
| <i>Afi-elav</i>    | AfiCDS.id11028.tr61396   | 1167              |
| <i>Afi-soxC</i>    | AfiCDS.id33804.tr61034   | 919               |
| <i>Afi-soxB1</i>   | AfiCDS.id91348.tr60524   | 1209              |
| <i>Afi-six3</i>    | AfiCDS.id45608.tr3325    | 775               |
| <i>Afi-pax6</i>    | AfiCDS.id10654.tr45582   | 1335              |
| <i>Afi-neuroD</i>  | AfiCDS.id1482.tr19514    | 809               |
| <i>Afi-atonal</i>  | afiReg.id242420.tr108354 | 858               |
| <i>Afi-nkx2.1</i>  | AfiCDS.id21551.tr13724   | 1012              |
| <i>Afi-musashi</i> | AfiCDS.id55115.tr52827   | 1245              |
| <i>Afi-soxB2</i>   | AfiCDS.id23770.tr24943   | 700               |

Table S2: List of probes used for WMISH. All cDNA fragments were cloned in pGEMT-easy vector and AS probes were transcribed using either T7 or Sp6 polymerase.

References:

- Annunziata, Rossella, and Maria Ina Arnone. 2014. "A Dynamic Regulatory Network Explains ParaHox Gene Control of Gut Patterning in the Sea Urchin." *Development (Cambridge, England)* 141 (12): 2462–72. <https://doi.org/10.1242/dev.105775>.
- Yoko Nakajima, Hiroyuki Kaneko, Greg Murray, and Robert D. Burke. 2004. "Divergent Patterns of Neural Development in Larval Echinoids and Asteroids." *Evolution & Development* 6: 95–104.
